# Supplementary material
Source: MDPI journal article supplement (https://www.mdpi.com/2071-1050/12/14/5604)
Supplement: s1 [file s1]

# Supplement

Dimensions:

C= Collaboration, L = Learning, U= Usefulness

|    |   |                                                                                                                    | Strongly disagree |   |   |   |   | Strongly agree | I don't know / no view |
|----|---|--------------------------------------------------------------------------------------------------------------------|-------------------|---|---|---|---|----------------|------------------------|
| 1  | C | The exercises were focused on collaboration                                                                        | 1                 | 2 | 3 | 4 | 5 | 0              |                        |
| 2  | C | Sufficient forms of discussions, i.e. seminars were provided immediately after the exercise                        | 1                 | 2 | 3 | 4 | 5 | 0              |                        |
| 3  | C | There were opportunities to improvise and try alternative strategies to collaborate                                | 1                 | 2 | 3 | 4 | 5 | 0              |                        |
| 4  | C | Collaboration was initiated immediately when the exercise started, without unnecessary waiting time                | 1                 | 2 | 3 | 4 | 5 | 0              |                        |
| 5  | C | I performed well-known activities during the exercise                                                              | 1                 | 2 | 3 | 4 | 5 | 0              |                        |
| 6  | C | Personnel who needed to improve in collaboration participated                                                      | 1                 | 2 | 3 | 4 | 5 | 0              |                        |
| 7  | C | Clear instructions of collaborative practise were presented                                                        | 1                 | 2 | 3 | 4 | 5 | 0              |                        |
| 8  | C | My points of view were regarded                                                                                    | 1                 | 2 | 3 | 4 | 5 | 0              |                        |
| 9  | L | I learnt new things during the exercise                                                                            | 1                 | 2 | 3 | 4 | 5 | 0              |                        |
| 10 | L | I learnt about organisational aspects of the collaborating parties                                                 | 1                 | 2 | 3 | 4 | 5 | 0              |                        |
| 11 | L | I learnt about communication patterns of the collaborating parties                                                 | 1                 | 2 | 3 | 4 | 5 | 0              |                        |
| 12 | L | I learnt about the ways in which collaborating parties prioritise activities                                       | 1                 | 2 | 3 | 4 | 5 | 0              |                        |
| 13 | L | I learnt new concepts and abbreviations used by the collaborating parties                                          | 1                 | 2 | 3 | 4 | 5 | 0              |                        |
| 14 | U | Based on what I learnt, the exercises were useful for real life activities during actual emergency work            | 1                 | 2 | 3 | 4 | 5 | 0              |                        |
| 15 | U | Based on what I learnt, the exercises were useful for command officers                                             | 1                 | 2 | 3 | 4 | 5 | 0              |                        |
| 16 | U | Based on what I learnt, the exercises were useful for ordinary operative staff (command officers not included)     | 1                 | 2 | 3 | 4 | 5 | 0              |                        |
| 17 | U | Based on what I learnt, the experiences from the exercise were so useful that it will have impact on my daily work | 1                 | 2 | 3 | 4 | 5 | 0              |                        |
